# Supplementary material
Source: PubMed Central journal article supplement (PMC3502631)
Supplement: NIHMS419621-supplement-1.pdf [file NIHMS419621-supplement-1.pdf]

## Supporting Information for

### ***“In-vitro Replication Studies on O<sup>2</sup>-Methylthymidine and O<sup>4</sup>-Methylthymidine”***

Nisana Andersen<sup>1</sup>, Jianshuang Wang<sup>1</sup>, Pengcheng Wang<sup>2</sup>, Yong Jiang<sup>2</sup> and Yinsheng Wang<sup>1,2,\*</sup>

<sup>1</sup>Department of Chemistry and <sup>2</sup>Environmental Toxicology Graduate Program, University of California, Riverside, California 92521-0403

*Chem. Res. Toxicol.*, 2012

**Figure S1.** Product-ion spectrum of the  $[M-4H]^4$  ion ( $m/z$  1300.4) of the 17-mer ODN d(CCATGGCAXGAGAATTC), where “X” is  $O^2$ -MdT (A) and  $O^4$ -MdT (B). Shown in the inset is the negative-ion ESI-MS for the ODNs.

**Figure S2.** Calibration curves for the ratios of unextended primer d(AATTCTC) to d(AATTCTCATGC) (i.e., 11A) (A); d(AATTCTCA) (i.e., 8A) to 11A (B); d(AATTCTCG) (i.e., 8G) to 11A (C); d(AATTCTCTGC) (i.e., 10Del) to 11A (D); d(AATTCTCCTGC) (i.e., 11C) to 11A (E); d(AATTCTCTTGC) (i.e., 11T) to 11A (F); d(AATTCTCGTGC) (i.e., 11G) to 11A (G).

**Figure S3.** Representative gel images for steady-state kinetic assays measuring nucleotide incorporation opposite undamaged dT (A),  $O^2$ -MdT (B), and  $O^4$ -MdT (C) with Kf<sup>-</sup> (0.7-7 nM). Reactions were conducted in the presence of individual dNTPs with the highest concentrations indicated in the figures. The ratios of dNTP concentrations were 0.5-0.6 between neighboring lanes.

**Figure S4.** Representative gel images for steady-state kinetic assays measuring nucleotide incorporation opposite undamaged dT (A),  $O^2$ -MdT (B), and  $O^4$ -MdT (C) with human DNA polymerase  $\kappa$  (1-5 nM). Reactions were conducted in the presence of individual dNTPs with the highest concentrations indicated in the figures. The concentration ratios of dNTP between neighboring lanes were 0.5-0.6.

**Figure S5.** Representative gel images for steady-state kinetic assays measuring nucleotide incorporation opposite undamaged dT (A),  $O^2$ -MdT (B), and  $O^4$ -MdT (C) with yeast polymerase  $\eta$  (7.5 nM). Reactions were conducted in the presence of individual dNTPs with the highest concentrations indicated in the figures. The concentration ratios of dNTP between neighboring lanes were 0.5-0.6.

**Figure S6.** (A) The total-ion chromatogram derived from the LC-MS/MS analysis of the human pol  $\kappa$ -induced replication products of  $O^2$ -MdT-containing substrates that have been treated with two restriction enzymes, NcoI and EcoRI plus shrimp alkaline phosphatase. (B) ESI-MS averaged from the peaks eluting in 18.5-20.5 min in part (A), where ‘T\*’ designates the remnant of the digested template containing the damaged site, i.e., d(CATGGCAXGAG), where ‘X’ is  $O^2$ -MdT, and ‘P\*’ designates the 5’ portion of the digested primer, i.e., d(GCTAGGATCATAG)

**Figure S7.** Analysis of the unextended primer and +1 extension products from the human pol  $\kappa$ -induced replication reaction arising from replication of  $O^2$ -MdT-containing substrates that have been treated with two restriction enzymes, NcoI and EcoRI, and shrimp alkaline phosphatase. Product-ion spectra of the ESI-produced  $[M-2H]^2$  ion of: the 7mer, d(AATTCTC) (precursor ion  $m/z$  1026.2) (A); 8A, d(AATTCTCA) (precursor ion  $m/z$  1182.7) (B); 8G, d(AATTCTCG) (precursor ion  $m/z$  1190.7) (C); 10Del, d(AATTCTCTGC) (precursor ion  $m/z$  1487.3) (D). In this and the following MS/MS figures, the arrow indicates the fragmentation process, and the solid and open circles represent the precursor ion and fragment ions, respectively.

**Figure S8.** Analysis of full-length extension products from the human pol  $\kappa$ -induced replication reaction arising from replication of  $O^2$ -MdT-containing substrates that have been treated with

two restriction enzymes, NcoI and EcoRI, and shrimp alkaline phosphatase. Product-ion spectra of the ESI-produced  $[M-2H]^{2-}$  ions of: 11C, d(AATTCTCCTGC) (precursor ion  $m/z$  1631.8) (A); 11T, d(AATTCTCTTGC) (precursor ion  $m/z$  1639.3) (B); 11A, d(AATTCTCATGC) (precursor ion  $m/z$  1643.8) (C); 11G, d(AATTCTCGTGC) (precursor ion  $m/z$  1651.7) (D).

**Figure S9.** The selected-ion chromatograms (SICs) derived from the LC-MS/MS analysis of the replication mixture of the substrate containing dT with: Klenow fragment  $exo^-$  (A), yeast pol  $\eta$  (B), and human pol  $\kappa$  (C).

**Figure S10.** The SICs derived from the LC-MS/MS analysis of the replication mixture of the substrate containing  $O^2$ -MdT with: Klenow fragment  $exo^-$  (A), and yeast pol  $\eta$  (B).

**Figure S11.** The SICs derived from the LC-MS/MS analysis of the replication mixture of the substrate containing  $O^4$ -MdT with: Klenow fragment  $exo^-$  (A), yeast pol  $\eta$  (B), and human pol  $\kappa$  (C).

**Figure S12.** LC-MS/MS for monitoring possible demethylation of  $O^2$ -MdT-containing template following primer extension with human pol  $\kappa$  and restriction digestion. Shown are the SICs derived from ultra-zoom scans monitoring the  $[M-3H]^{3-}$  ions from the unmethylated and  $O^2$ -MdT 12mer arising from the digestion of the original  $O^2$ -MdT-containing template.

**Figure S13.** LC-MS/MS for monitoring possible demethylation of  $O^2$ -MdT-containing templates following primer extension with human pol  $\kappa$ . Shown are the product-ion spectra of the ESI-produced  $[M-3H]^{3-}$  ions of: unmethylated 12mer, d(CATGGCCATGAG) (precursor ion  $m/z$  1221.9) (A); original 12mer, d(CATGGCCA[ $O^2$ -MdT]GAG) (precursor ion  $m/z$  1226.5) (B).

**Figure S14.** The SICs derived from the LC-MS/MS analysis of the replication mixture of the substrate containing  $O^4$ -MdT with yeast pol  $\eta$ : low dNTPs (A), 6 hr (B).

**Figure S15.** Representative gel images for steady-state kinetic assays measuring extension past undamaged dT (A),  $O^2$ -MdT (B), and  $O^4$ -MdT (C) with the base opposite the lesion indicated in the figure. Reactions were conducted with human polymerase  $\kappa$  (1-5 nM) in the presence of individual dNTPs with the highest concentrations indicated in the figures. The concentration ratios of dNTP between neighboring lanes were 0.5-0.6.

**Table S1.** Summary of the percentages of replication products produced for  $O^4$ -MdT-containing substrates by yeast pol  $\eta$  as determined by LC-ESI-MS/MS experiments. Reactions were conducted under two separate conditions: (1) low dNTPs concentrations (50  $\mu$ M each) at 37°C overnight; (2) 1 mM dNTPs at 37°C for 6 hr. The template was d(CCATGGCA $X$ GAGAATTCTATGATCCTAG), where ' $X$ ' represents  $O^4$ -MdT.

**Table S2.** Efficiency and fidelity of human polymerase  $\kappa$ -mediated nucleotide extension with dATP and dGTP opposite undamaged dT,  $O^2$ -MdT and  $O^4$ -MdT as determined by steady-state kinetic measurements.



(A)

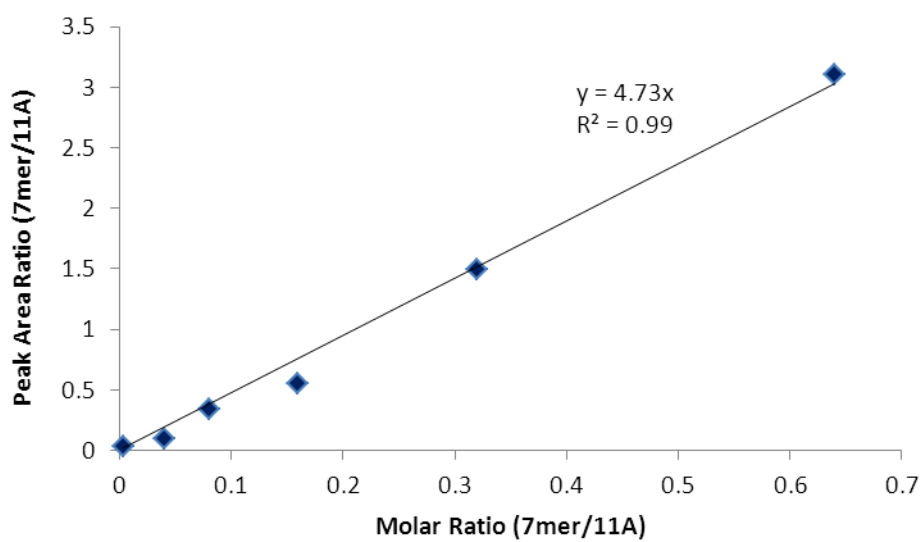

(B)

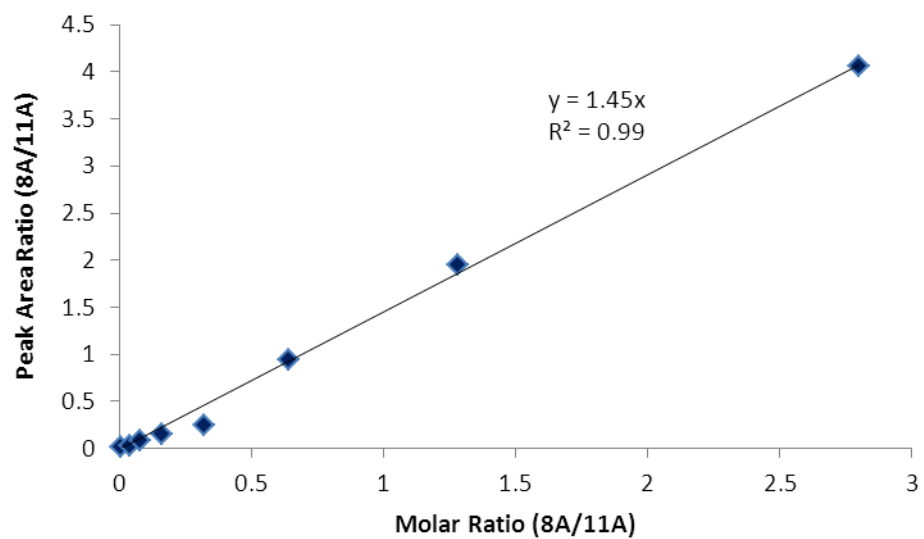

Figure S2.

(C)

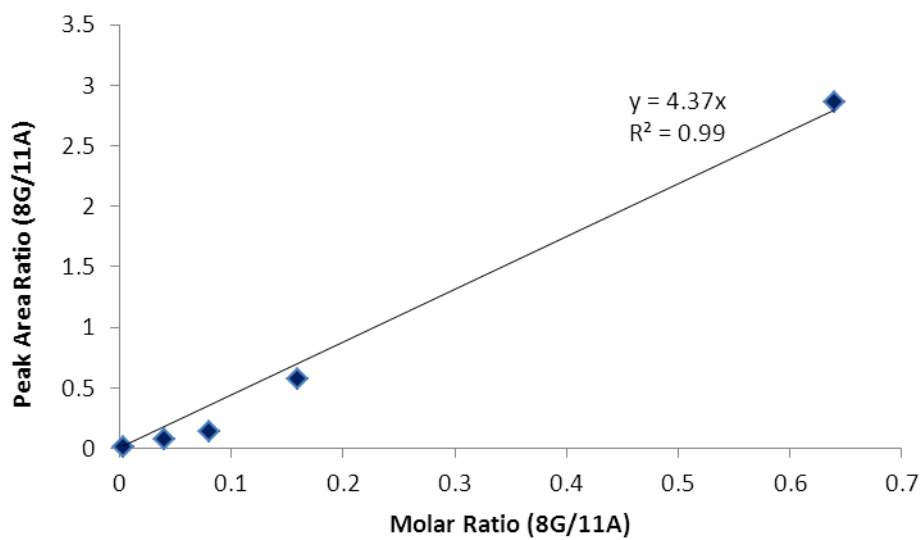

(D)

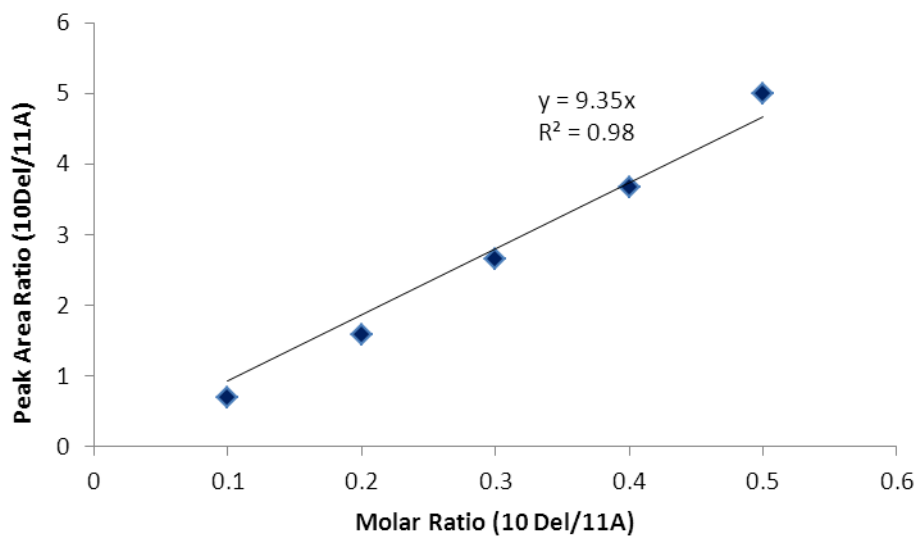

Figure S2.

(E)

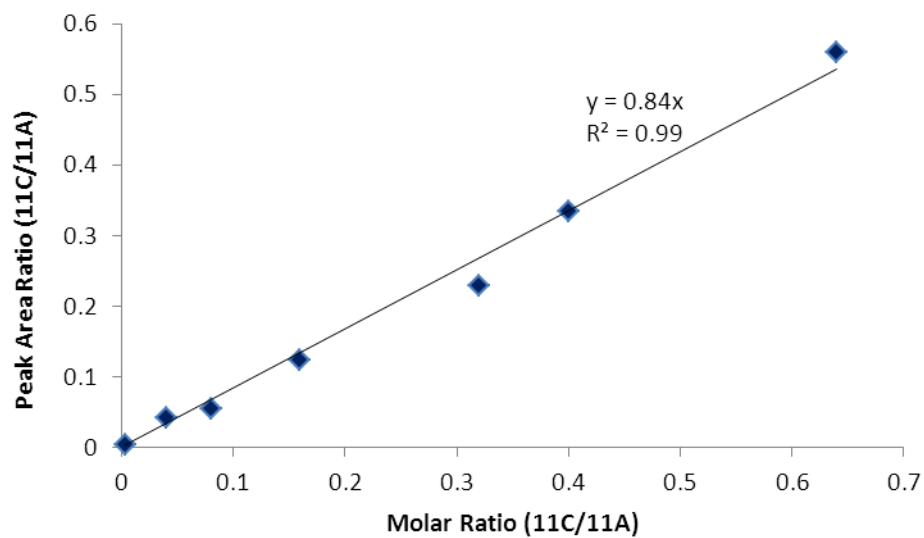

(F)

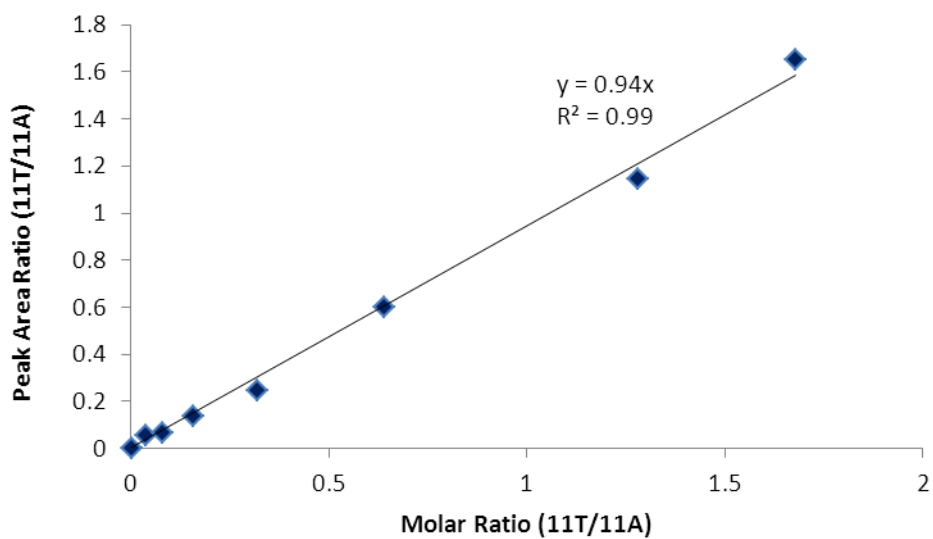

Figure S2.

(G)

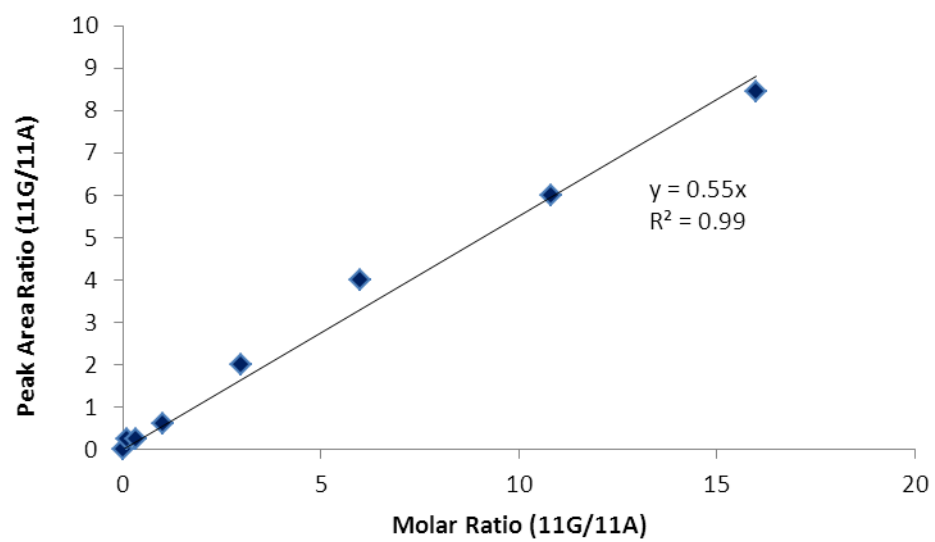

Figure S2.



Primer: 5'- <sup>32</sup>P GCTAGGATCATAGAATTCTC ↙ dNTP incorporation  
 Template: 3'- GATCCTAGTATCTTAAGAG[X]ACGGTACC - 5'

(A) X = dT

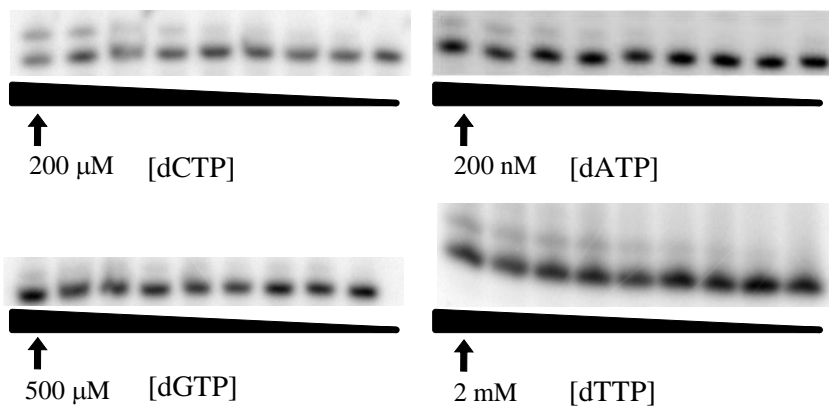

(B) X = [*O*<sup>2</sup>-MdT]

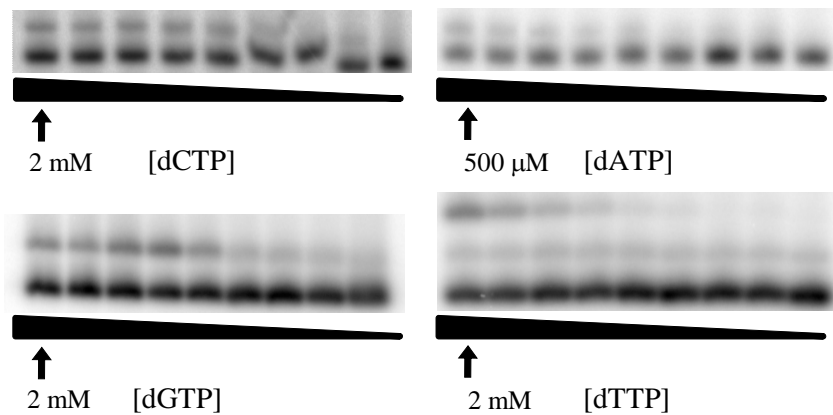

(C) X = [*O*<sup>4</sup>-MdT]

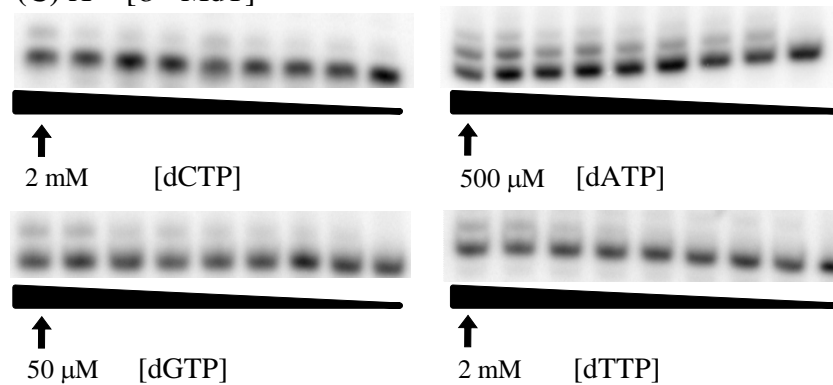

Figure S3.

Primer: 5' - <sup>32</sup>PGCTAGGATCATAGAATTCTC ↙  
 Template: 3' - GATCCTAGTATCTTAAGAG[X]ACGGTACC - 5'

(A) X = dT

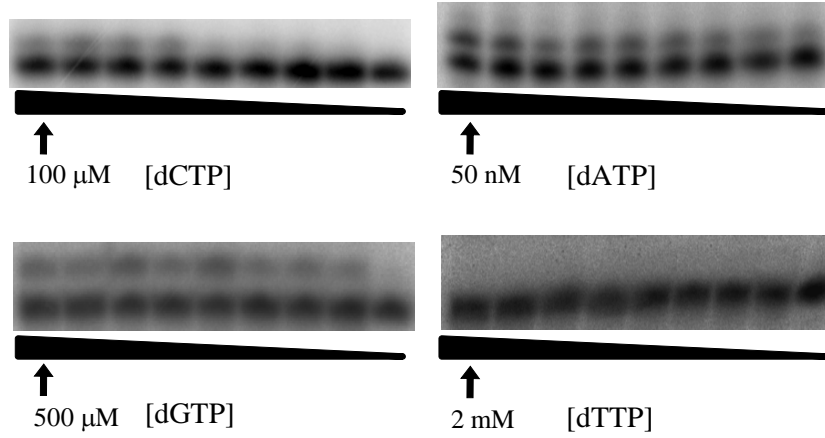

(B) X = [O<sup>2</sup>-MdT]

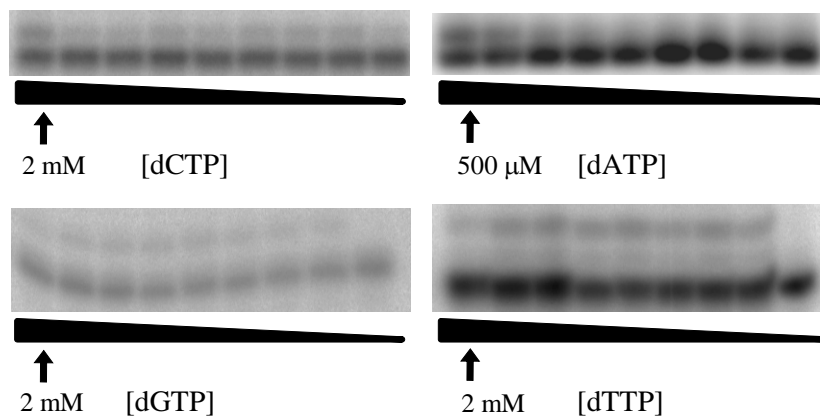

(C) X = [O<sup>4</sup>-MdT]

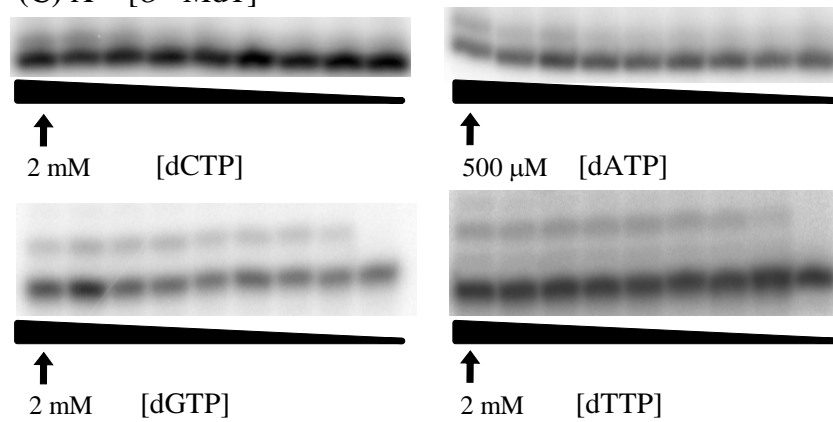

Figure S4.

dNTP incorporation

Primer: 5' - <sup>32</sup>P GCTAGGATCATAGAATTCTC

Template: 3' - GATCCTAGTATCTTAAGAG[X]ACGGTACC - 5'

(A) X = dT

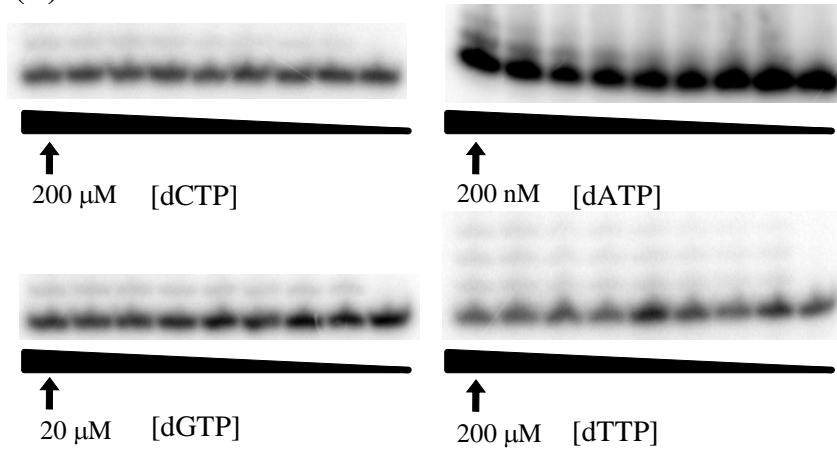

(B) X = [*O*<sup>2</sup>-MdT]

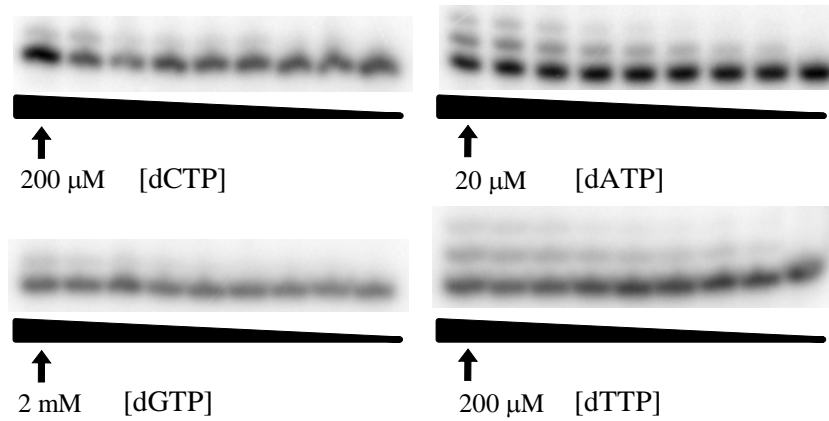

(C) X = [*O*<sup>4</sup>-MdT]

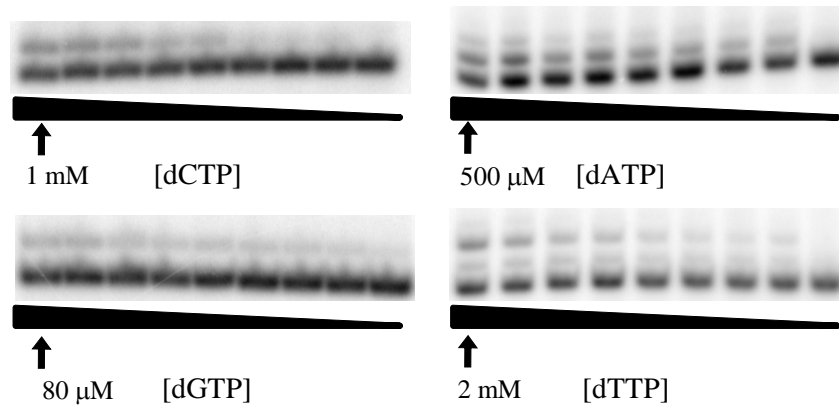

Figure S5.

(A)

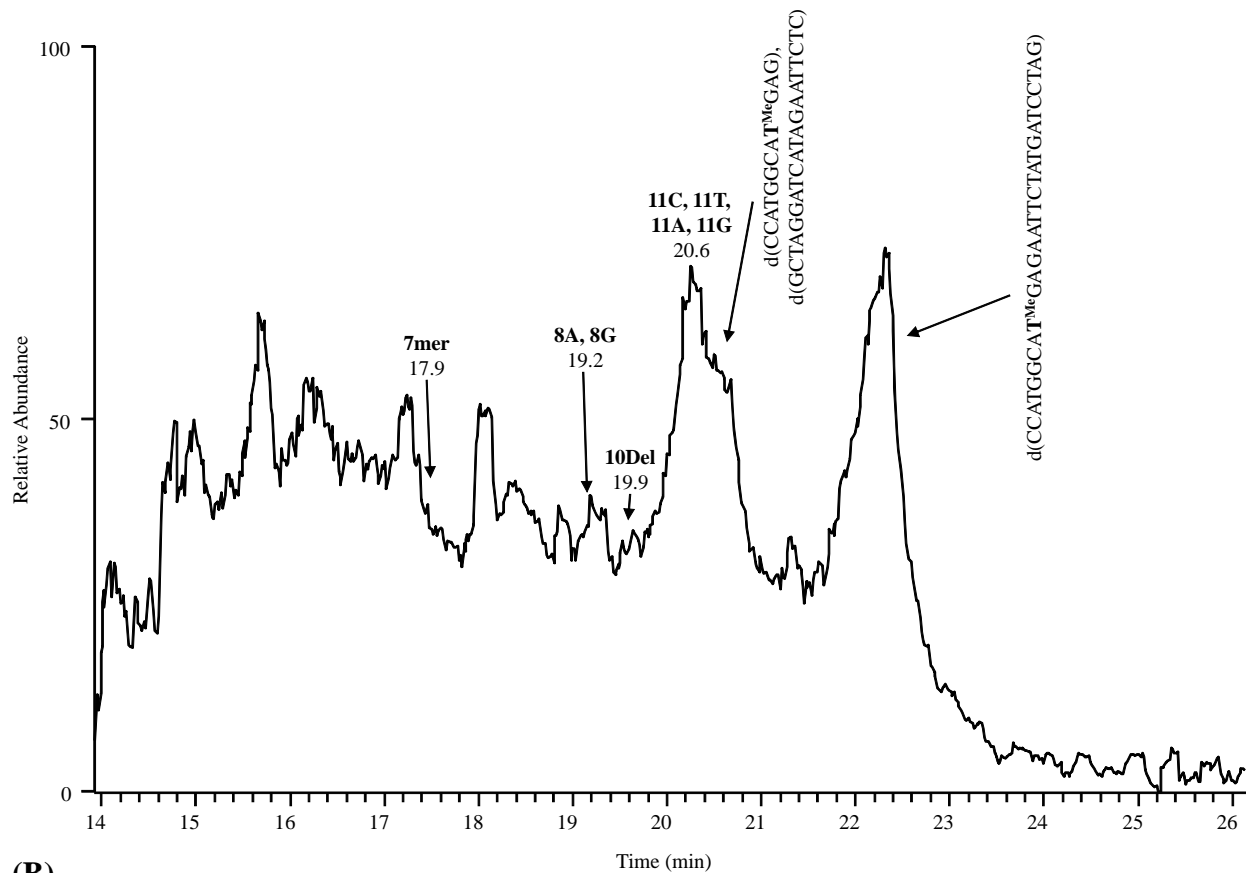

(B)

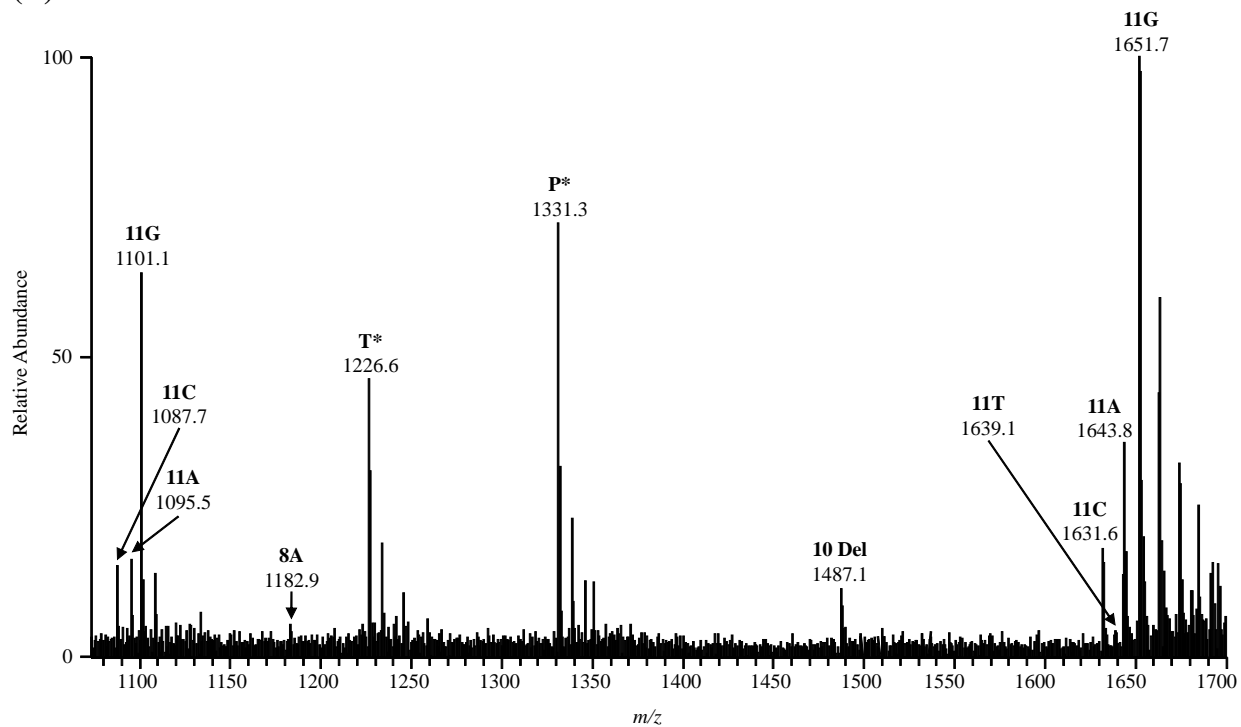

Figure S6.

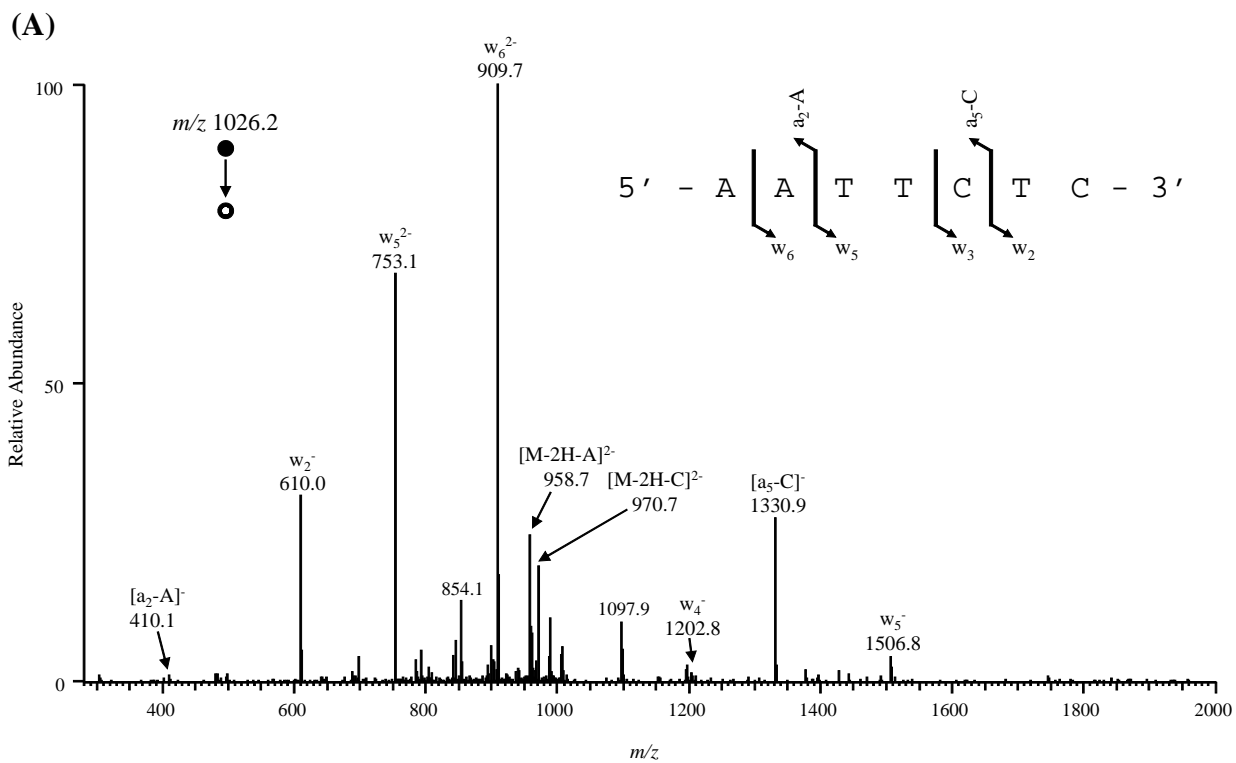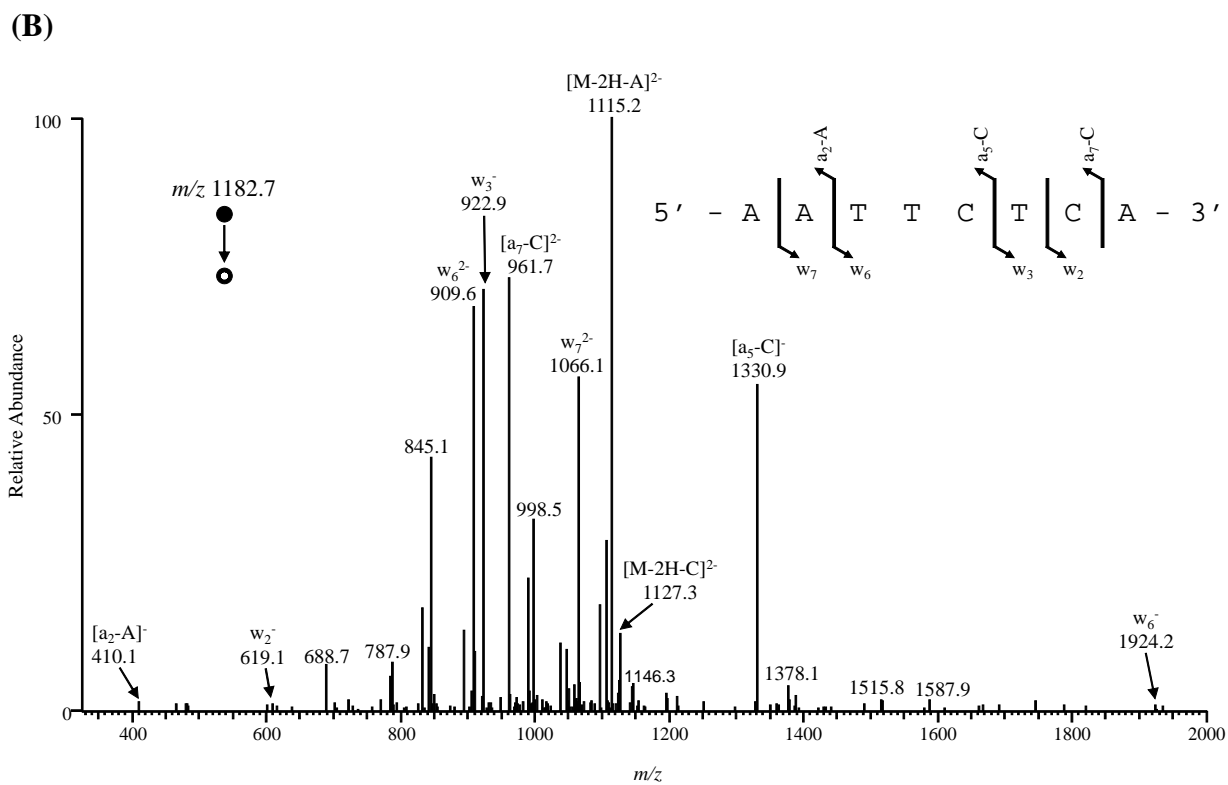

**Figure S7.**

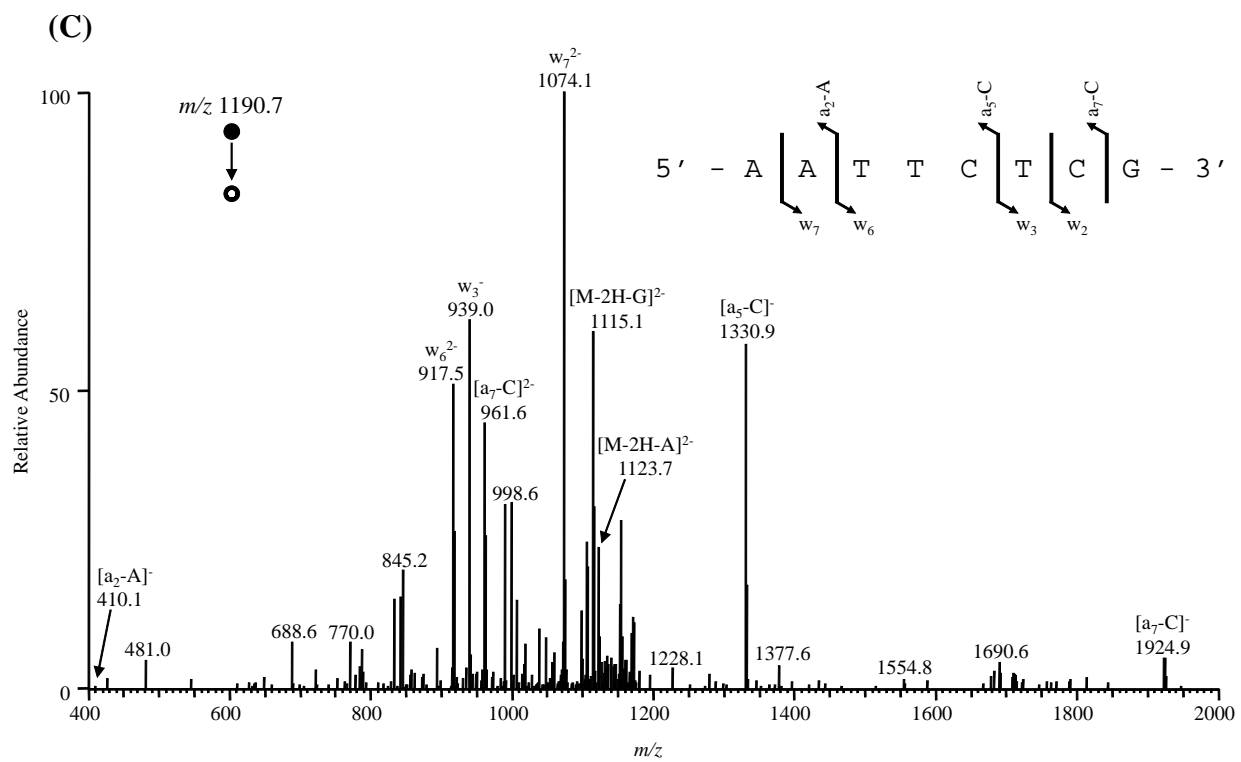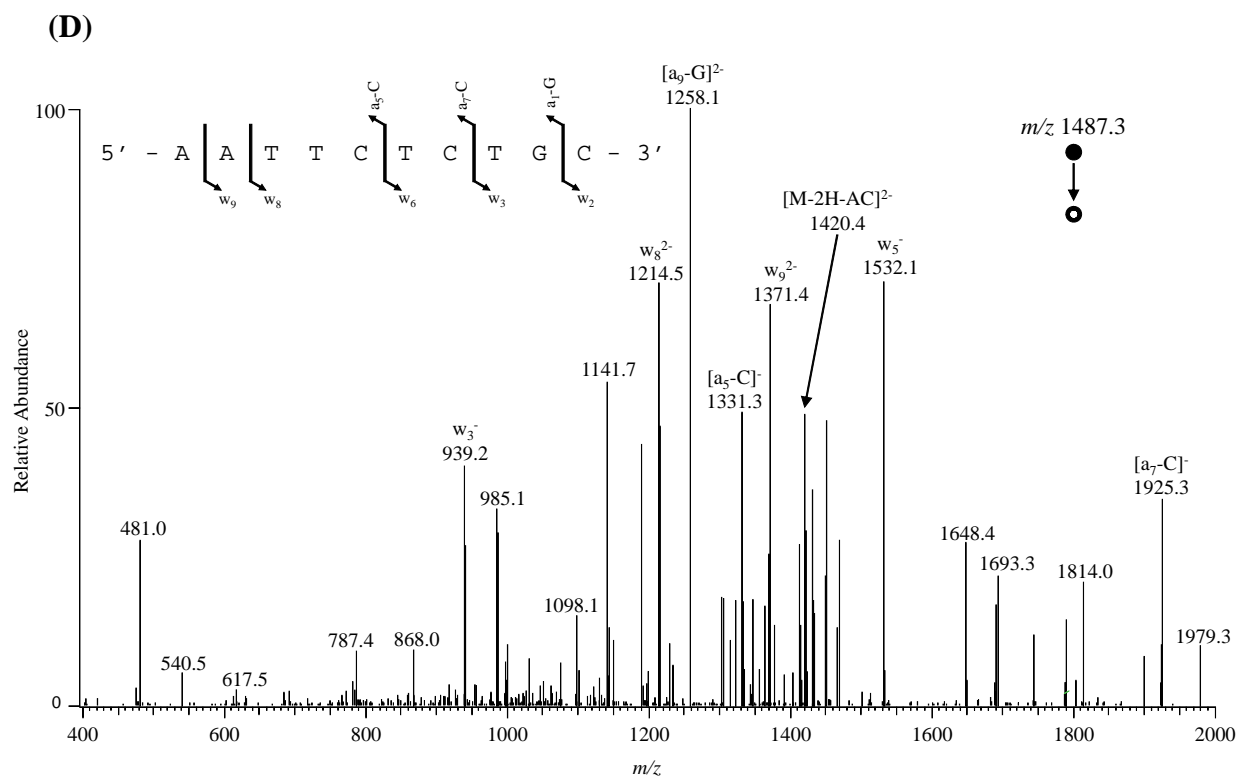

**Figure S7.**

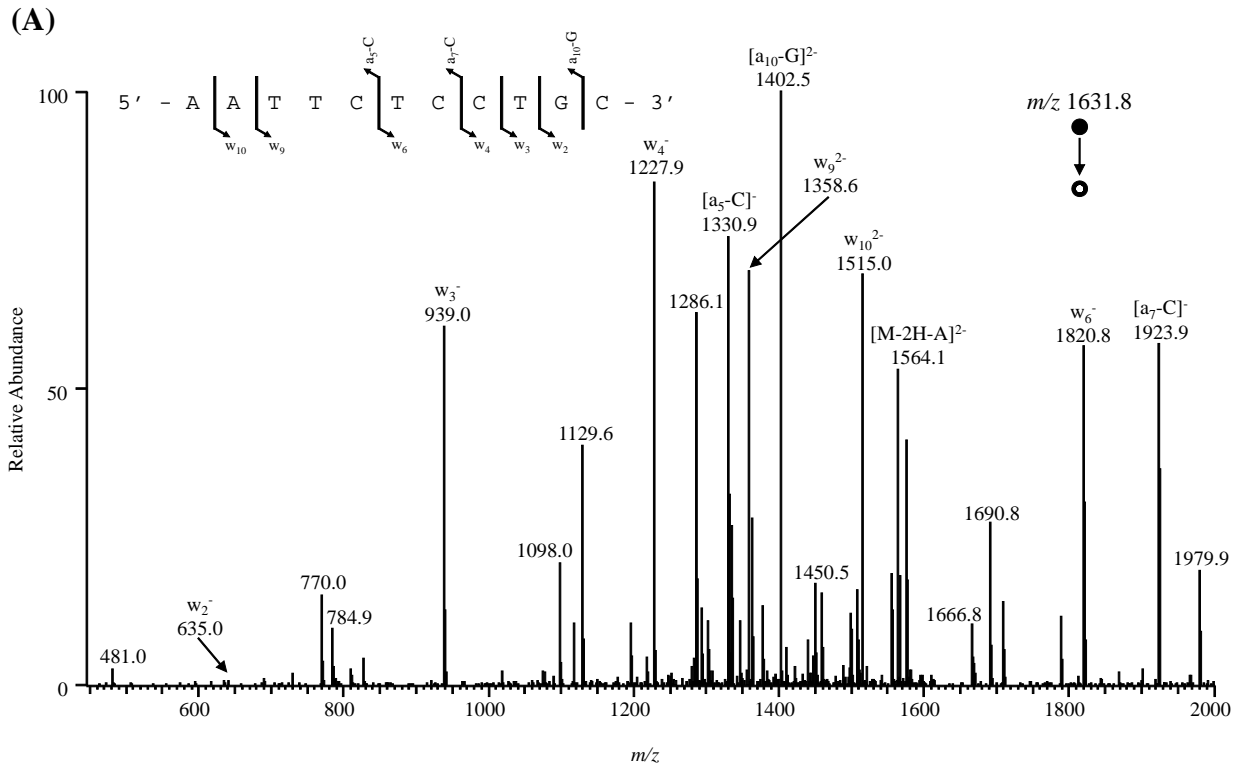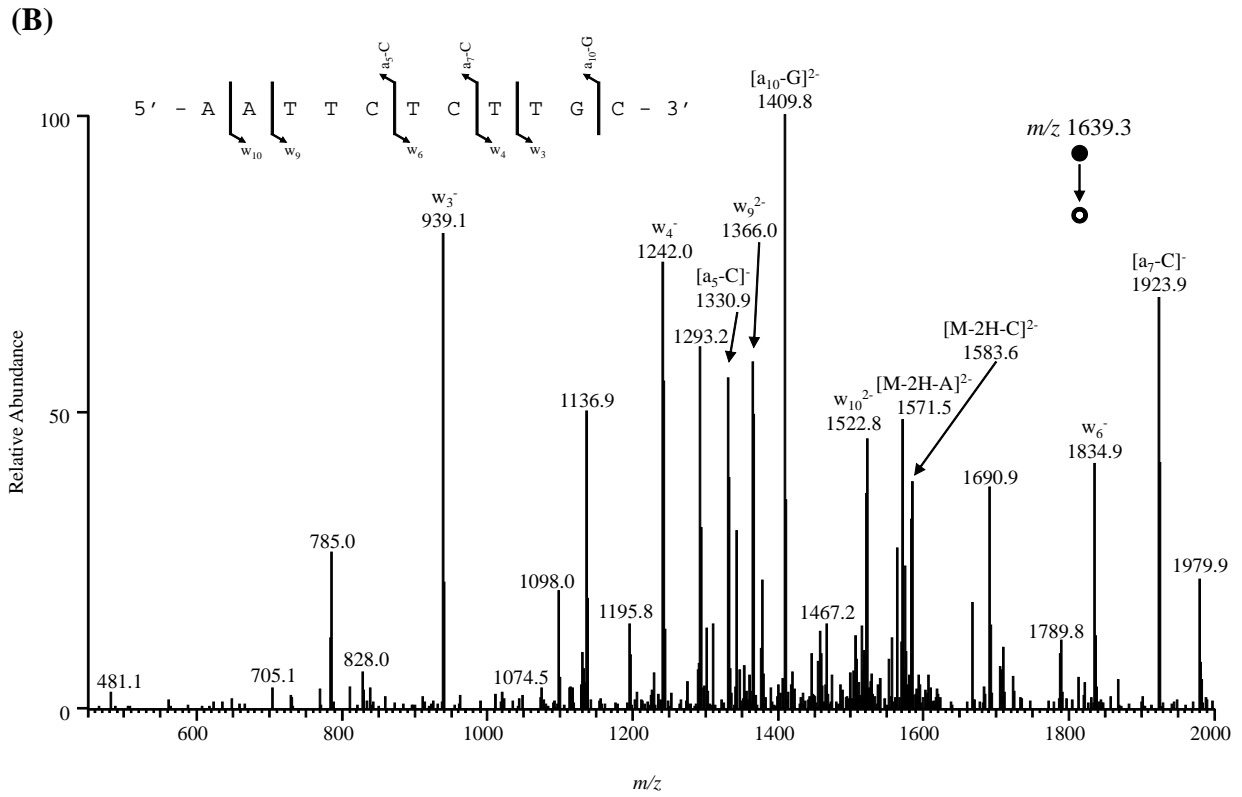

**Figure S8.**

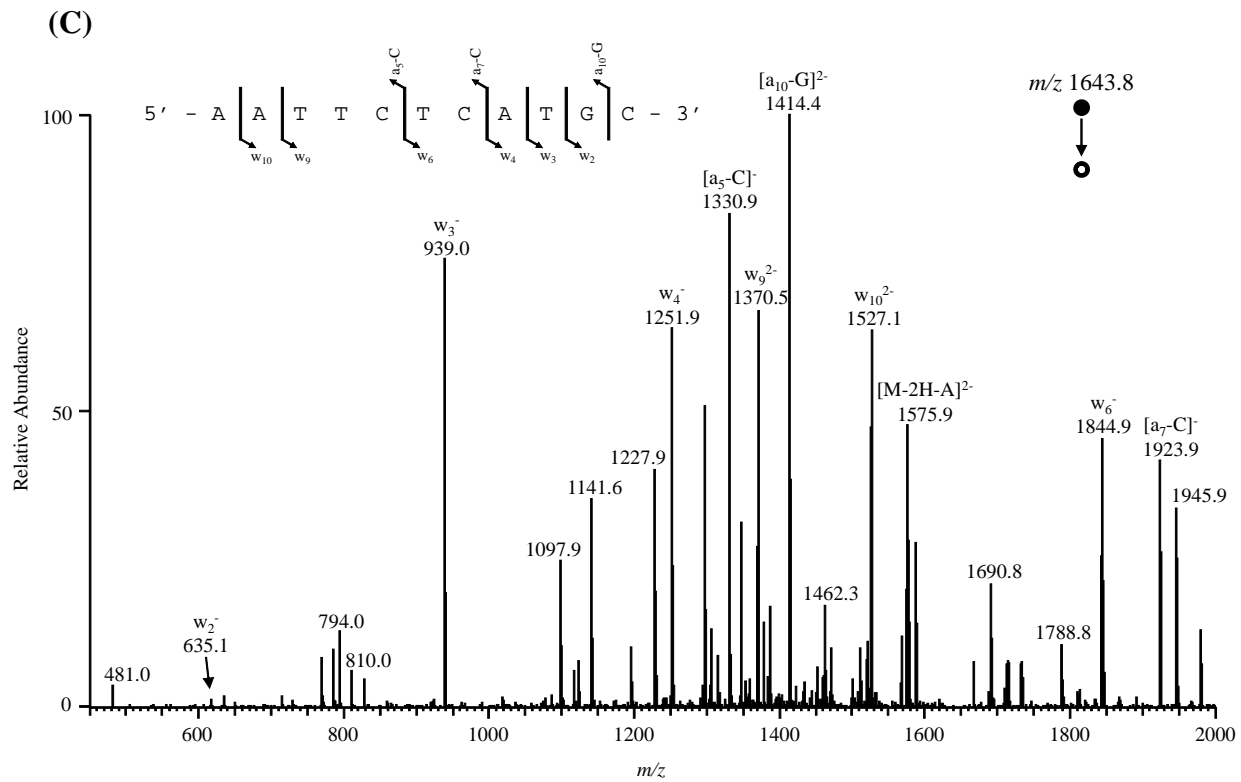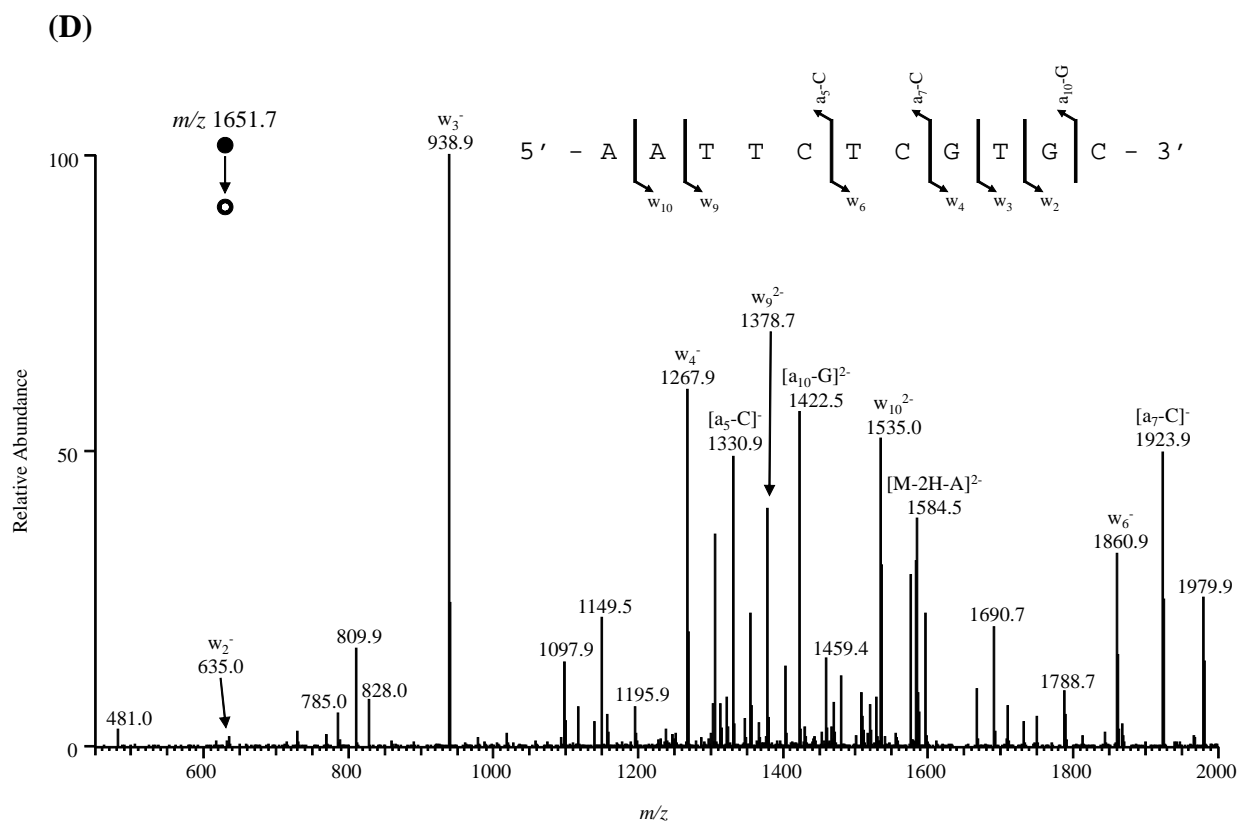

Figure S8.



(A)

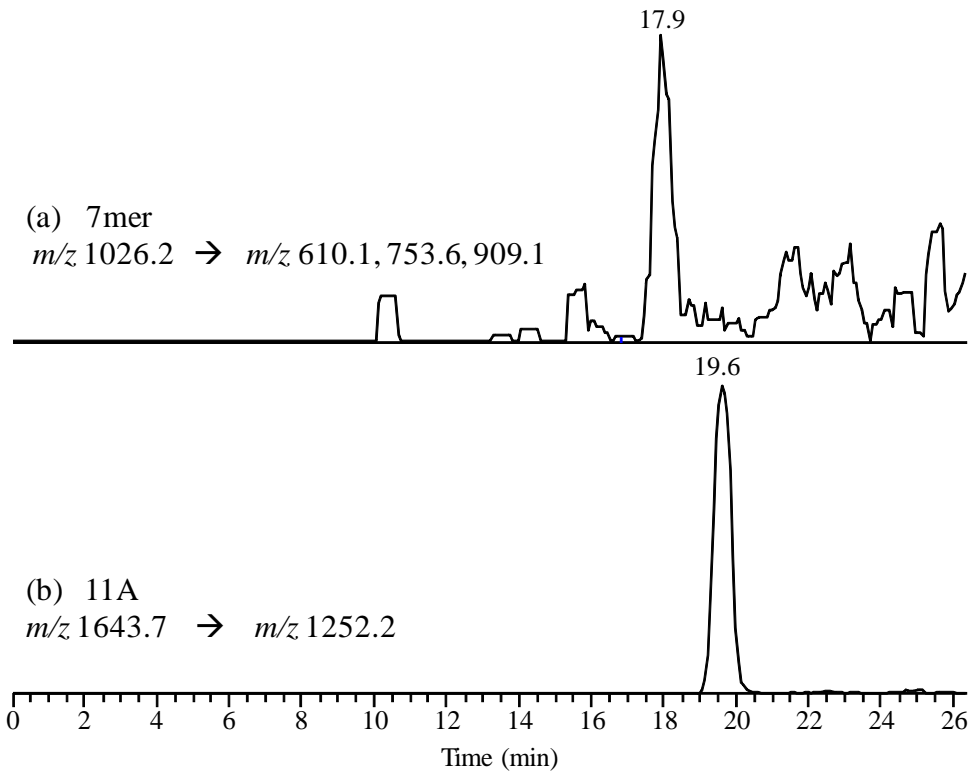

5' - GC **AXG** AGA ATT -3'  
3' - C TCT TAA -5'  
3' - CG TAC TCT TAA -5'

**7mer**  
**11A**

**2%**  
**98%**

}  
}

**dT Replication  
From Klenow  
fragment exo-**

**Figure S9.**

(B)

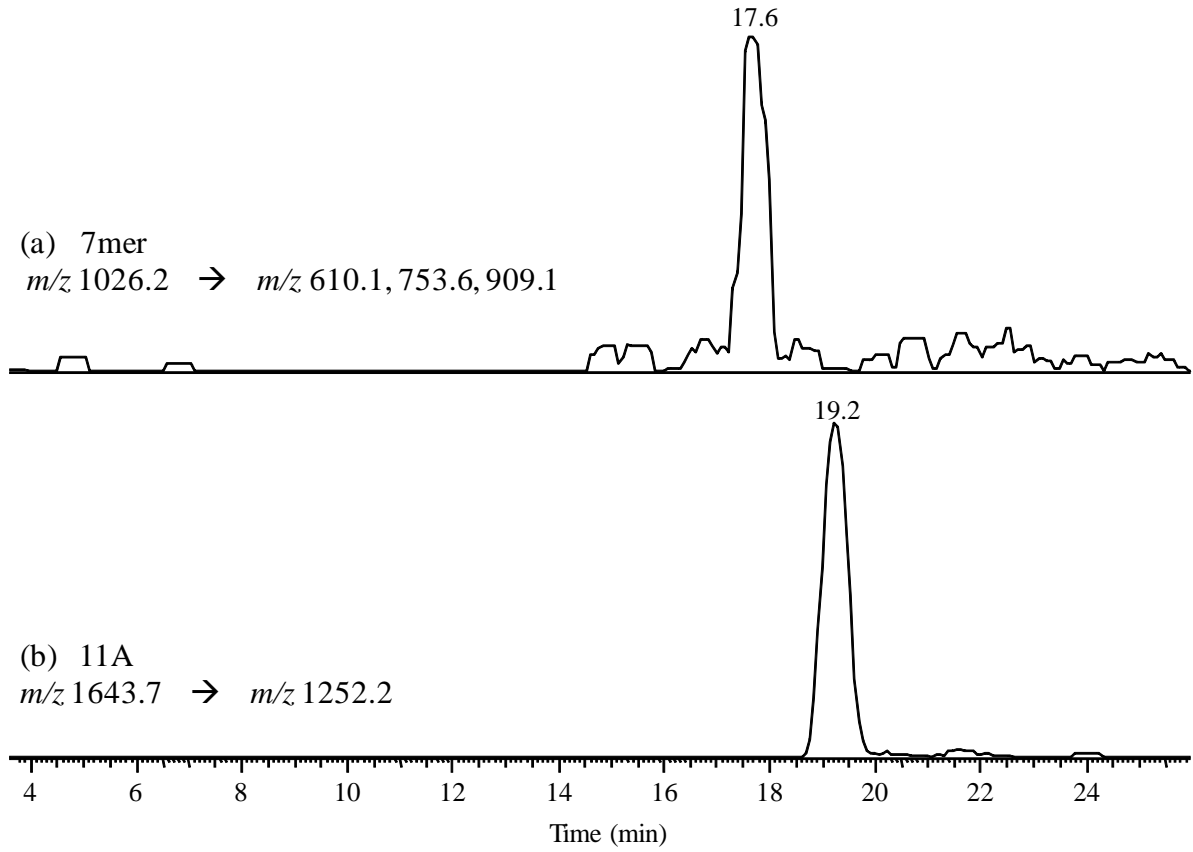

|                         |             |            |                                        |
|-------------------------|-------------|------------|----------------------------------------|
| 5' - GC AXG AGA ATT -3' |             |            |                                        |
| 3' - C TCT TAA -5'      | <b>7mer</b> | <b>4%</b>  | } <b>dT Replication<br/>From pol η</b> |
| 3' - CG TAC TCT TAA -5' | <b>11A</b>  | <b>96%</b> |                                        |

Figure S9.

(C)

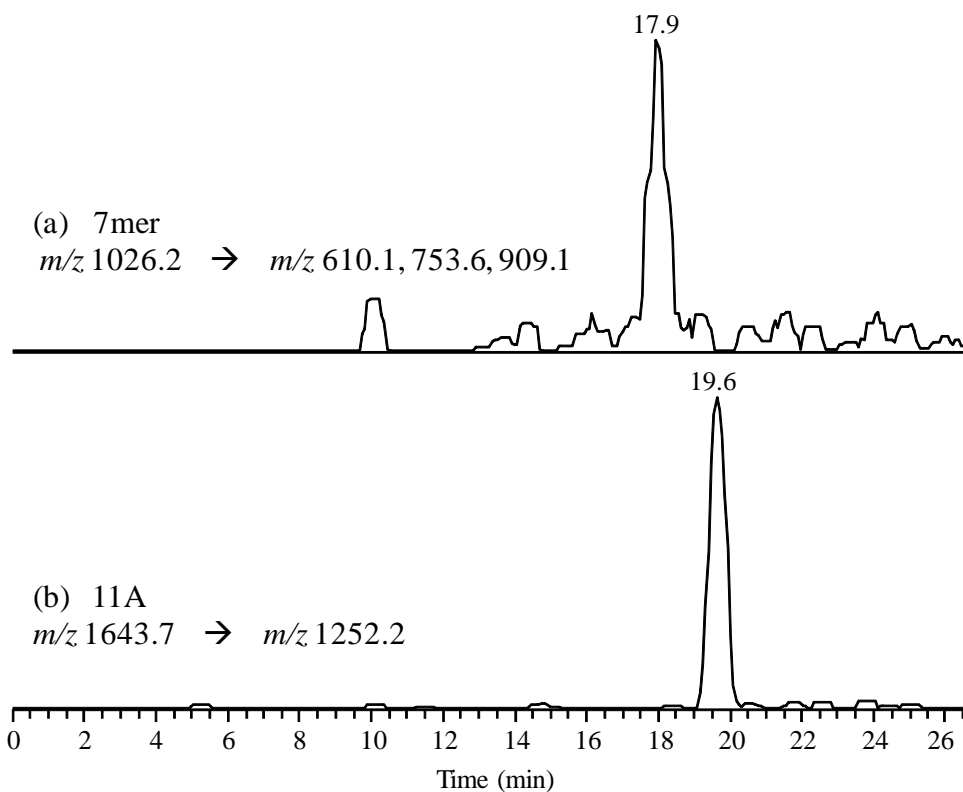

|                         |             |            |                                                          |
|-------------------------|-------------|------------|----------------------------------------------------------|
| 5' - GC AXG AGA ATT -3' |             |            |                                                          |
| 3' - C TCT TAA -5'      | <b>7mer</b> | <b>1%</b>  | } <b>dT Replication<br/>From pol <math>\kappa</math></b> |
| 3' - CG TAC TCT TAA -5' | <b>11A</b>  | <b>99%</b> |                                                          |

**Figure S9.**

(A)

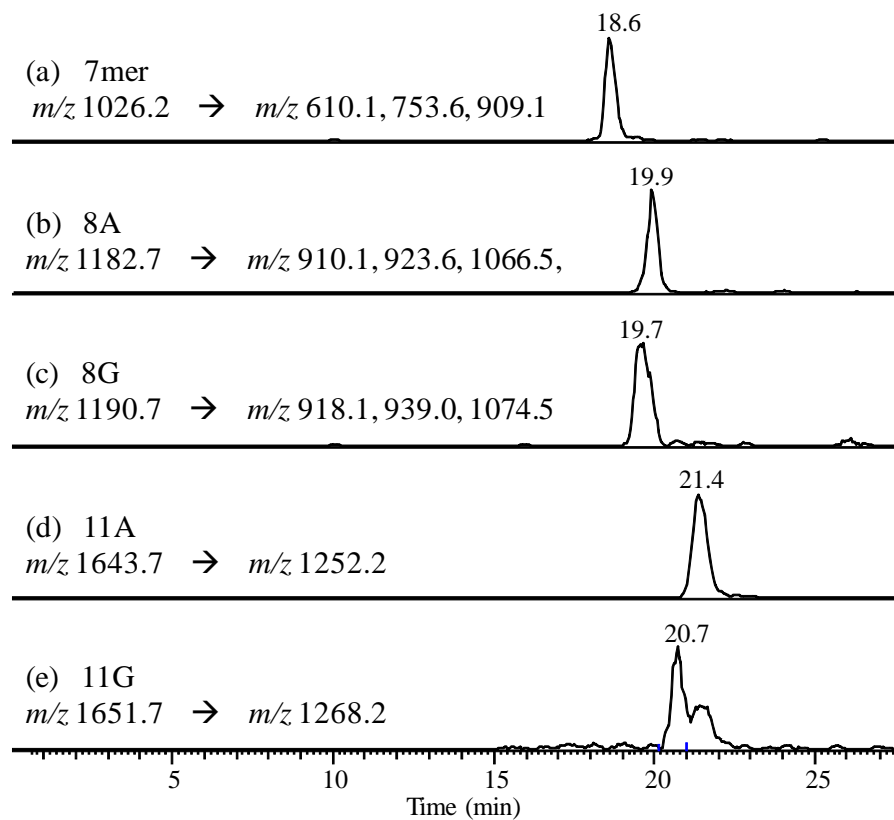

5' - GC AXG AGA ATT -3'  
3' - C TCT TAA -5'  
3' - AC TCT TAA -5'  
3' - GC TCT TAA -5'  
3' - CG TAC TCT TAA -5'  
3' - CG TGC TCT TAA -5'

|             |            |
|-------------|------------|
| <b>7mer</b> | <b>2%</b>  |
| <b>8A</b>   | <b>9%</b>  |
| <b>8G</b>   | <b>4%</b>  |
| <b>11A</b>  | <b>77%</b> |
| <b>11G</b>  | <b>7%</b>  |

***O*<sup>2</sup>-MdT  
Replication From  
Klenow fragment  
exo<sup>-</sup>**

**Figure S10.**

(B)

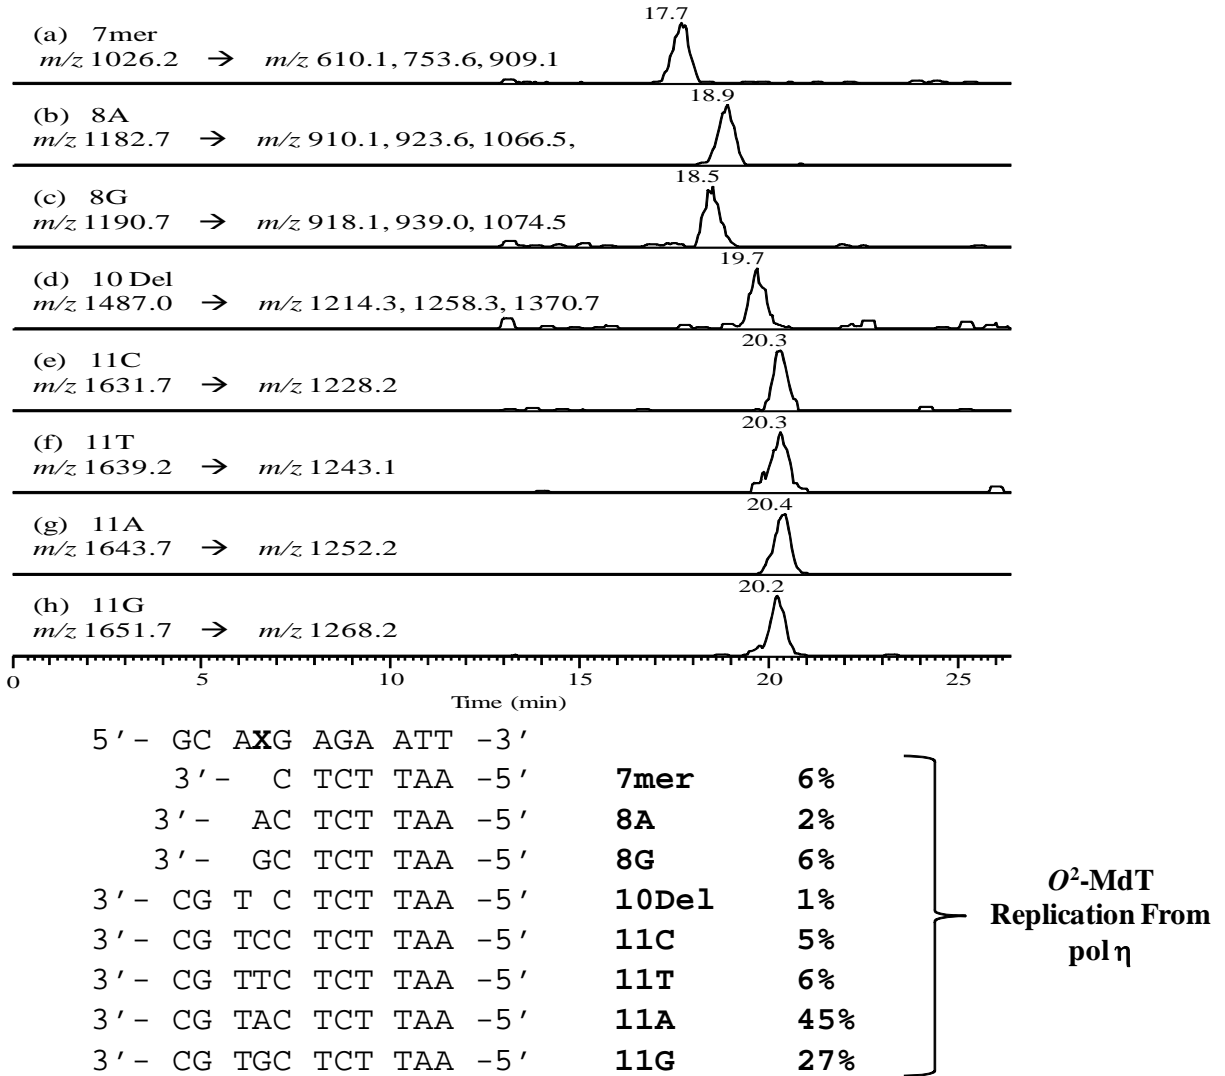

Figure S10.

(A)

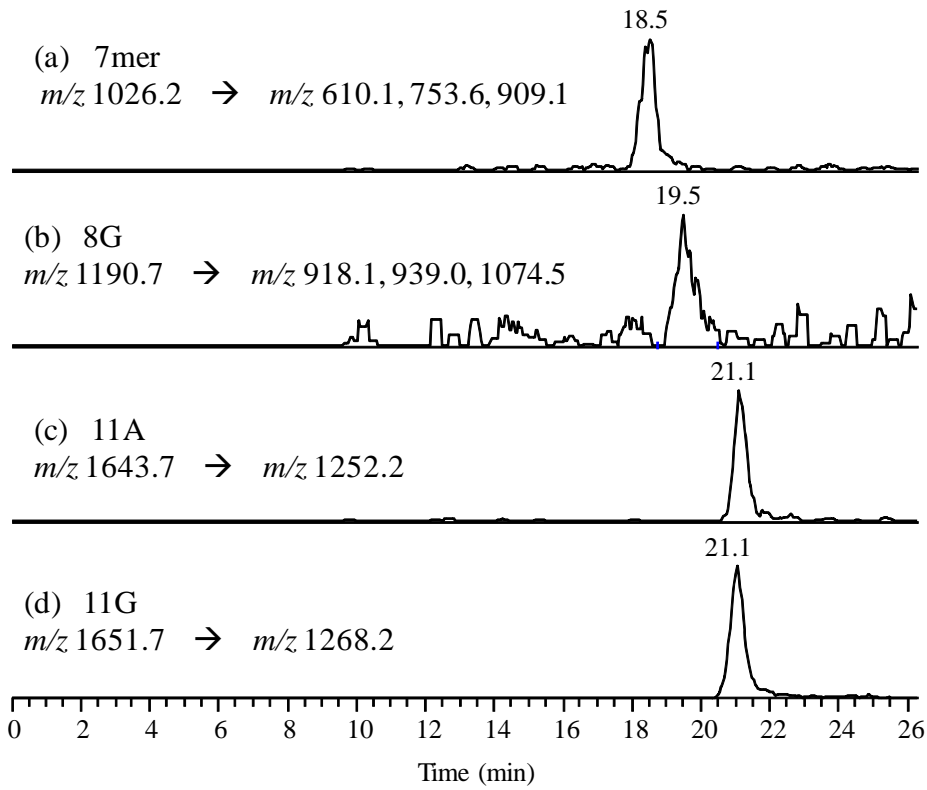

|                         |             |            |                                                                                     |
|-------------------------|-------------|------------|-------------------------------------------------------------------------------------|
| 5' - GC AXG AGA ATT -3' |             |            |                                                                                     |
| 3' - C TCT TAA -5'      | <b>7mer</b> | <b>7%</b>  | } <b><i>O</i><sup>4</sup>-MdT<br/>Replication From<br/>Klenow fragment<br/>exo'</b> |
| 3' - GC TCT TAA -5'     | <b>8G</b>   | <b>5%</b>  |                                                                                     |
| 3' - CG TAC TCT TAA -5' | <b>11A</b>  | <b>7%</b>  |                                                                                     |
| 3' - CG TGC TCT TAA -5' | <b>11G</b>  | <b>80%</b> |                                                                                     |

Figure S11.

(B)

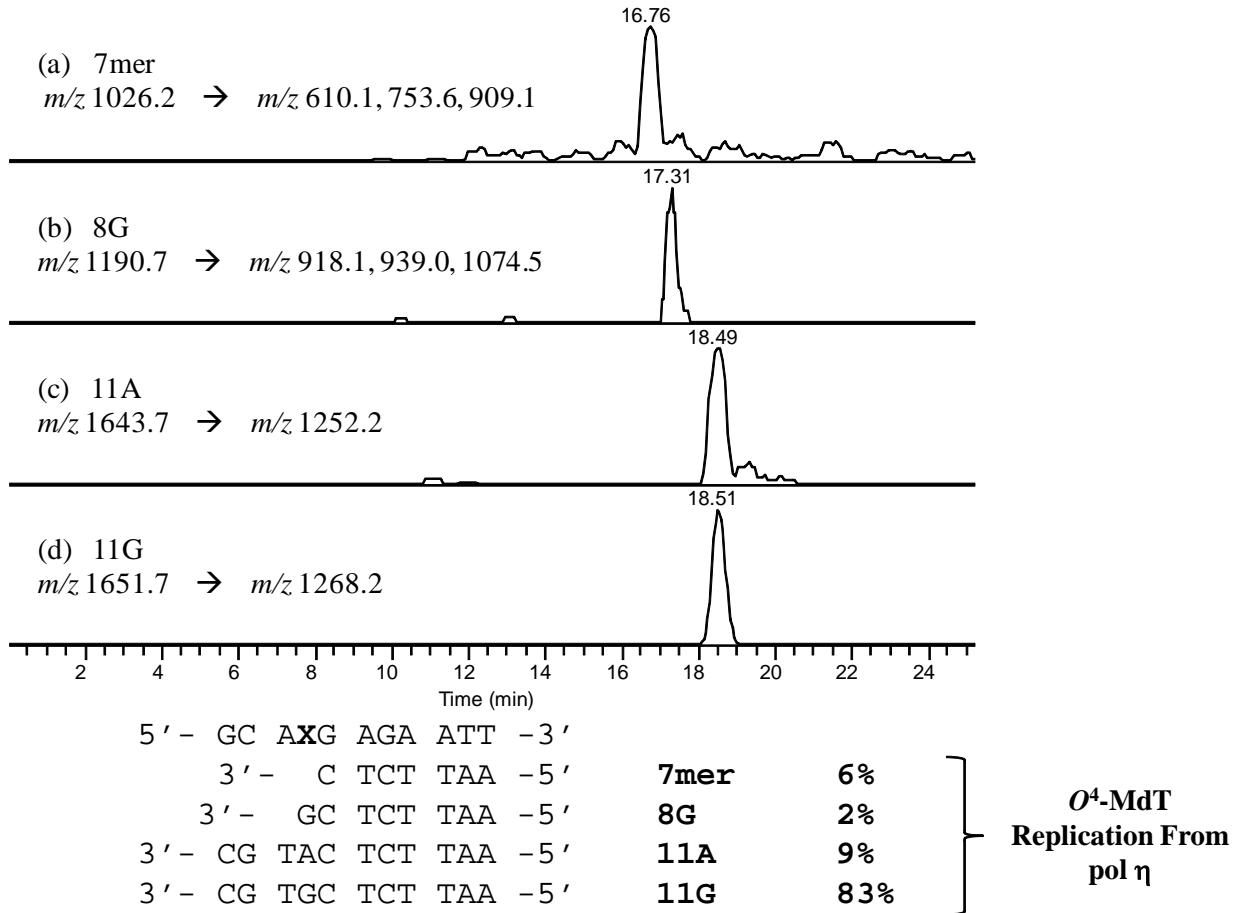

Figure S11.

(C)

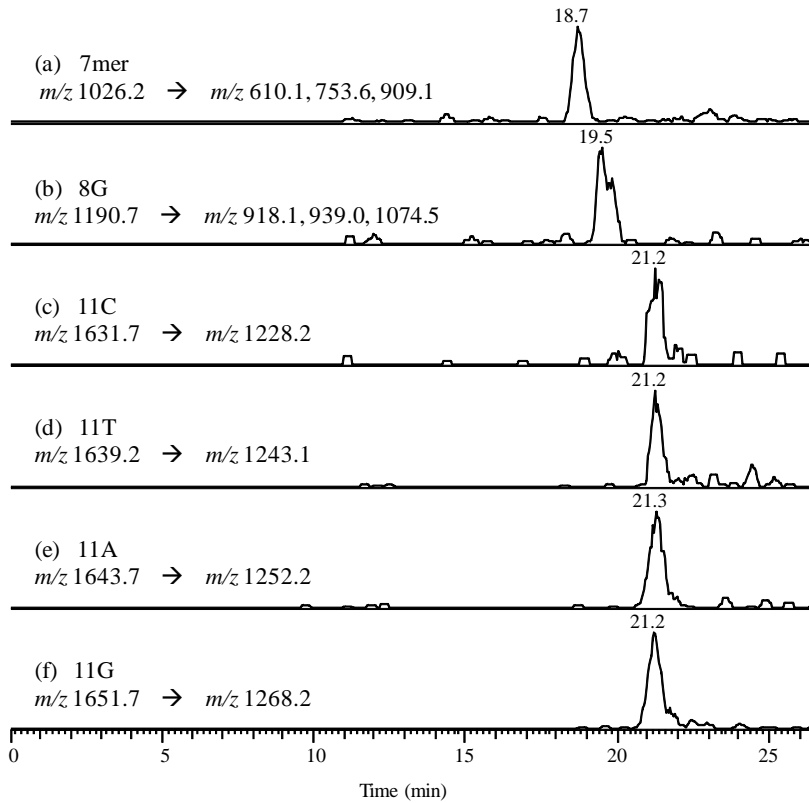

|                         |             |            |
|-------------------------|-------------|------------|
| 5' - GC AXG AGA ATT -3' |             |            |
| 3' - C TCT TAA -5'      | <b>7mer</b> | <b>11%</b> |
| 3' - GC TCT TAA -5'     | <b>8G</b>   | <b>18%</b> |
| 3' - CG TCC TCT TAA -5' | <b>11C</b>  | <b>2%</b>  |
| 3' - CG TTC TCT TAA -5' | <b>11T</b>  | <b>3%</b>  |
| 3' - CG TAC TCT TAA -5' | <b>11A</b>  | <b>8%</b>  |
| 3' - CG TGC TCT TAA -5' | <b>11G</b>  | <b>58%</b> |

} ***O*<sup>4</sup>-MdT  
Replication From  
polκ**

Figure S11.



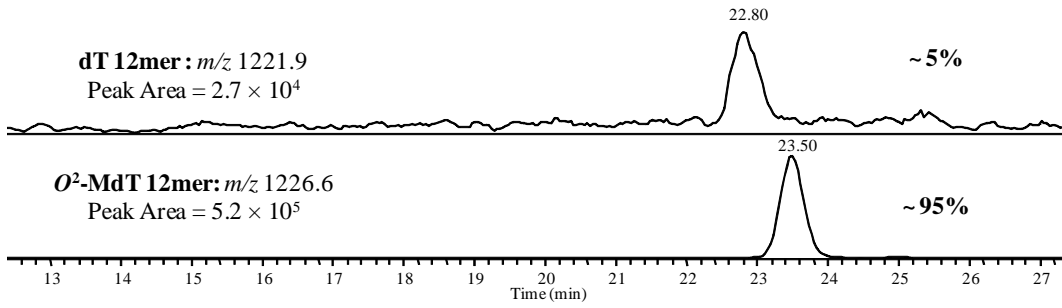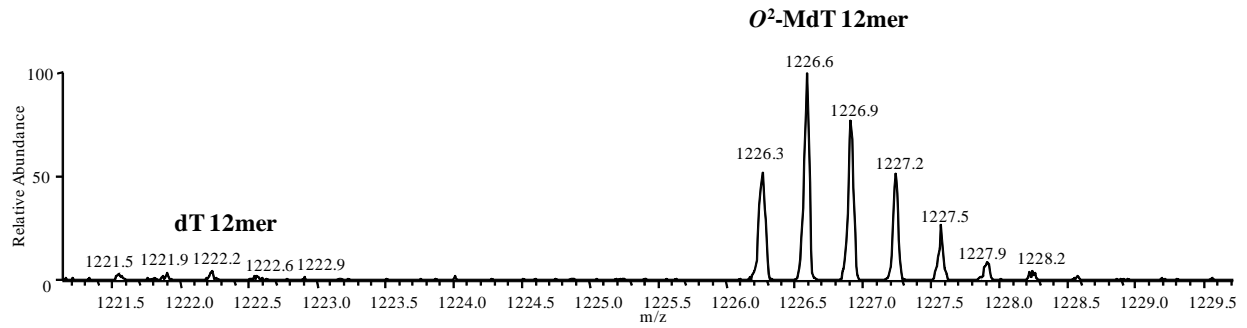

**Figure S12.**

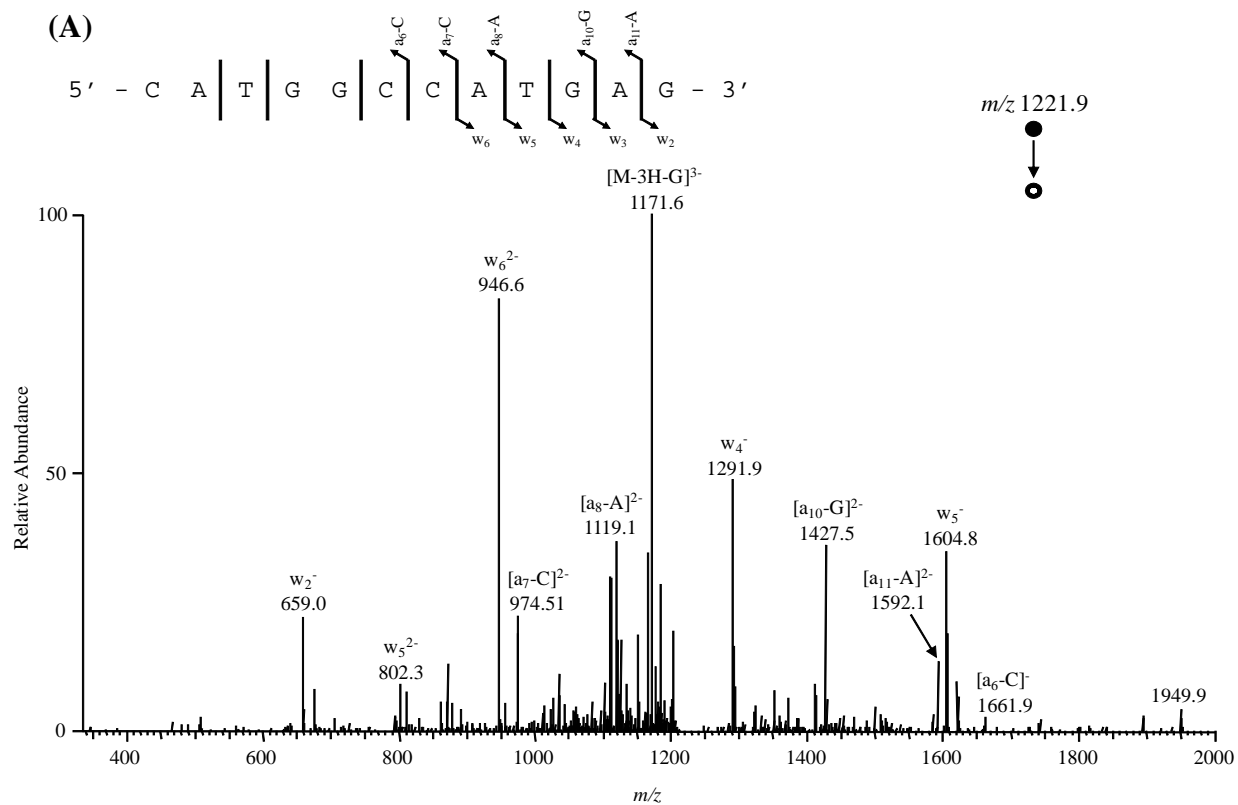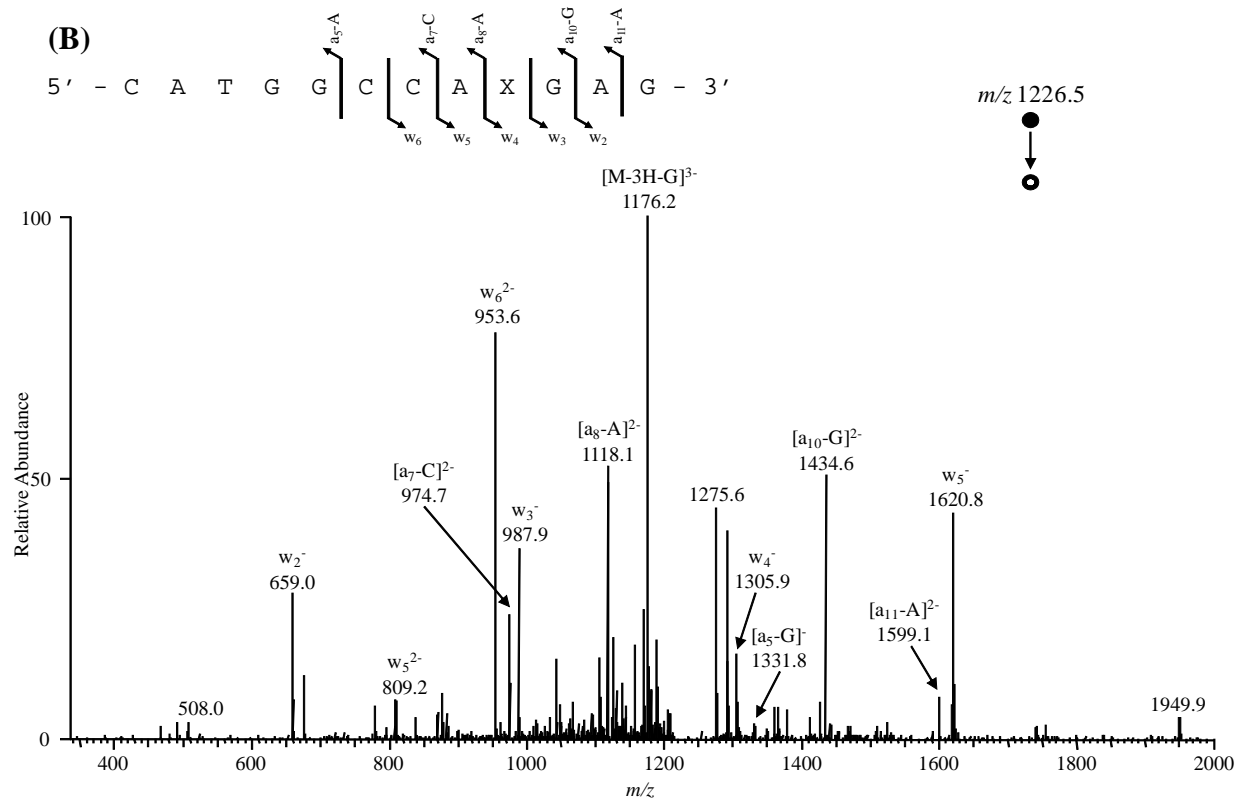

Figure S13

(A)

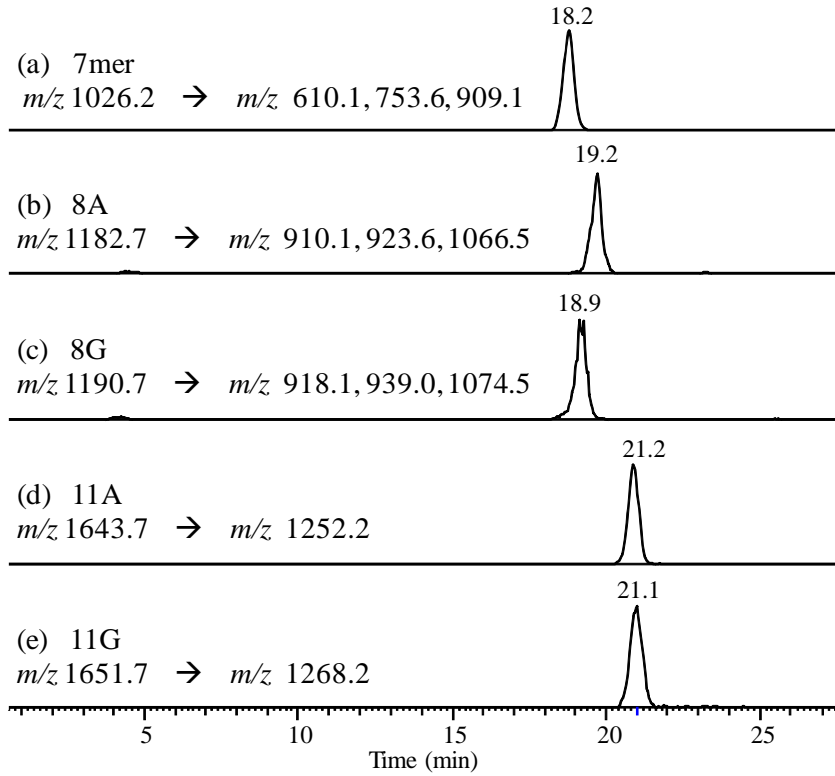

|                         |             |            |                                                                                                  |
|-------------------------|-------------|------------|--------------------------------------------------------------------------------------------------|
| 5' - GC AXG AGA ATT -3' |             |            |                                                                                                  |
| 3' - C TCT TAA -5'      | <b>7mer</b> | <b>5%</b>  | } <b><i>O</i><sup>4</sup>-MdT<br/>Replication From<br/>pol <math>\eta</math><br/>(low dNTPs)</b> |
| 3' - AC TCT TAA -5'     | <b>8A</b>   | <b>3%</b>  |                                                                                                  |
| 3' - GC TCT TAA -5'     | <b>8G</b>   | <b>8%</b>  |                                                                                                  |
| 3' - CG TAC TCT TAA -5' | <b>11A</b>  | <b>10%</b> |                                                                                                  |
| 3' - CG TGC TCT TAA -5' | <b>11G</b>  | <b>73%</b> |                                                                                                  |

Figure S14.

(B)

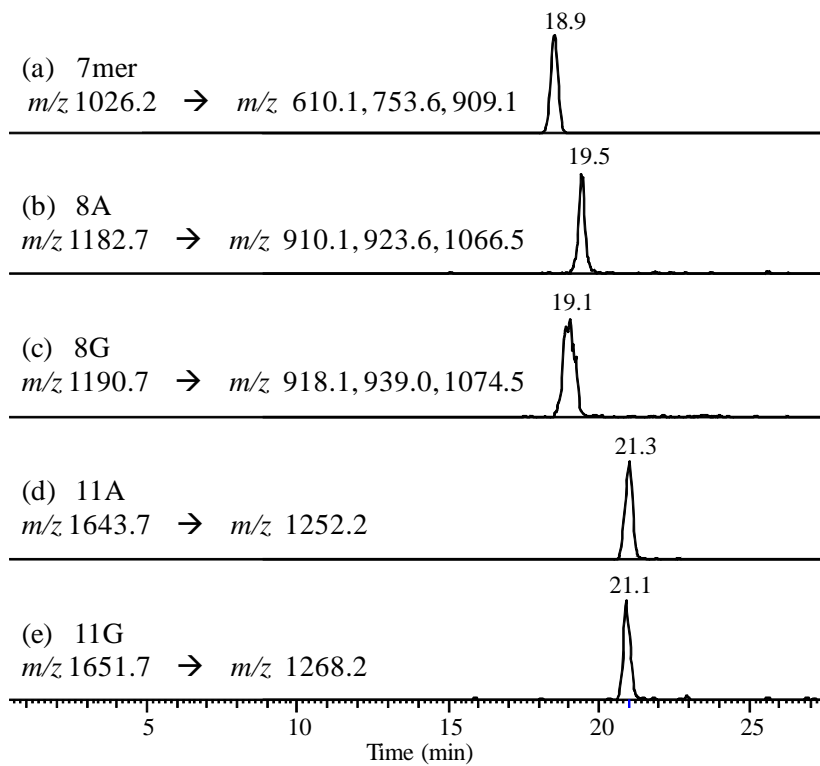

|                         |             |            |                                                                             |
|-------------------------|-------------|------------|-----------------------------------------------------------------------------|
| 5' - GC AXG AGA ATT -3' |             |            |                                                                             |
| 3' - C TCT TAA -5'      | <b>7mer</b> | <b>26%</b> | } <b><i>O</i><sup>4</sup>-MdT<br/>Replication From<br/>pol η<br/>(6 hr)</b> |
| 3' - AC TCT TAA -5'     | <b>8A</b>   | <b>3%</b>  |                                                                             |
| 3' - GC TCT TAA -5'     | <b>8G</b>   | <b>7%</b>  |                                                                             |
| 3' - CG TAC TCT TAA -5' | <b>11A</b>  | <b>3%</b>  |                                                                             |
| 3' - CG TGC TCT TAA -5' | <b>11G</b>  | <b>62%</b> |                                                                             |

Figure S14.

Primer: 5'- pGCTAGGATCATAGAATTCTC [N]  $\downarrow$  dTTP  
 Template: 3'- GATCCTAGTATCTTAAGAG [X] ACGGTACC-5'

(A) X = [dT]

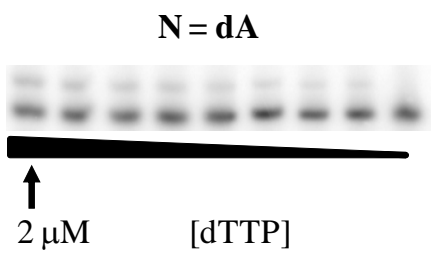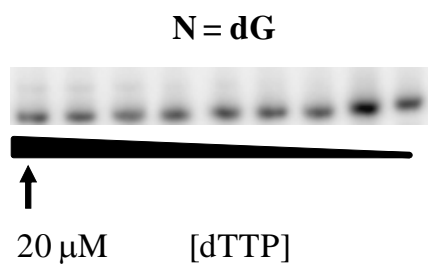

(B) X = [*O*<sup>2</sup>-MdT]

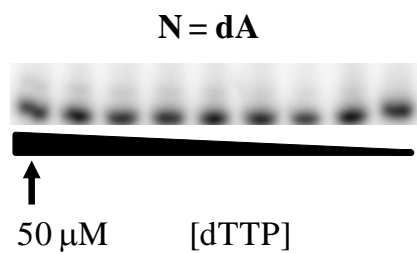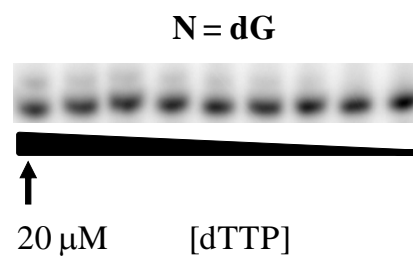

(C) X = [*O*<sup>4</sup>-MdT]

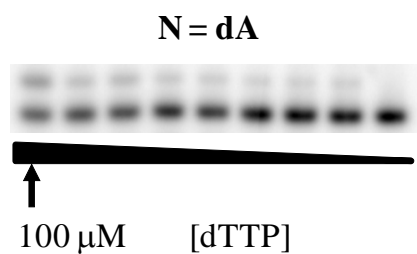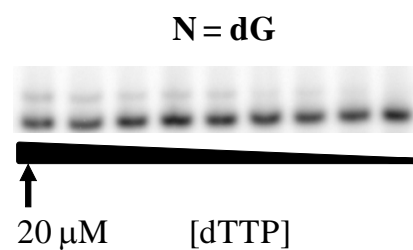

Figure S15

| Name                                      | Sequence       | <i>O</i> <sup>4</sup> -MdT (low dNTPs) | <i>O</i> <sup>4</sup> -MdT (6 hr) |
|-------------------------------------------|----------------|----------------------------------------|-----------------------------------|
| <b>Yeast Polymerase <math>\eta</math></b> |                |                                        |                                   |
| 7mer                                      | d(AATTCTC)     | 6                                      | 26                                |
| 8mer                                      | d(AATTCTCA)    | 3                                      | 3                                 |
| 8mer                                      | d(AATTCTCG)    | 8                                      | 7                                 |
| 11A                                       | d(AATTCTCATGC) | 10                                     | 3                                 |
| 11G                                       | d(AATTCTCGTGC) | 73                                     | 62                                |

**Table S1.**

| <b>dNTP</b>                     | <b><math>k_{\text{cat}}</math> (min<sup>-1</sup>)</b> | <b><math>K_m</math> (<math>\mu\text{M}</math>)</b> | <b><math>k_{\text{cat}}/K_m</math> (mM<sup>-1</sup> min<sup>-1</sup>)</b> | <b><math>f_{\text{ext}}</math></b> |
|---------------------------------|-------------------------------------------------------|----------------------------------------------------|---------------------------------------------------------------------------|------------------------------------|
| <b>Extension with dTTP</b>      |                                                       |                                                    |                                                                           |                                    |
| dT:dATP                         | 9.5 ± 0.4                                             | 0.56 ± 0.02                                        | 17                                                                        | 1                                  |
| dT:dGTP                         | 5.3 ± 0.1                                             | 2.2 ± 0.3                                          | 2.5                                                                       | 0.15                               |
| <i>O</i> <sup>2</sup> -MdT:dATP | 9.5 ± 0.4                                             | 7.8 ± 0.8                                          | 1.2                                                                       | 1                                  |
| <i>O</i> <sup>2</sup> -MdT:dGTP | 13 ± 1                                                | 7.5 ± 0.5                                          | 1.7                                                                       | 1.4                                |
| <i>O</i> <sup>4</sup> -MdT:dATP | 10 ± 1                                                | 26 ± 2                                             | 0.38                                                                      | 1                                  |
| <i>O</i> <sup>4</sup> -MdT:dGTP | 27 ± 2                                                | 11 ± 1                                             | 2                                                                         | 5.2                                |

\*The  $K_m$  and  $k_{\text{cat}}$  were average values based on three independent measurements

**Table S2.**
